# Supplementary material for: Comprehensive machine learning and experimental verification reveal the mechanism of action of autophagy-related genes FIZ1 and FBXO21 in acute kidney injury
Source: PeerJ. 2026 Feb 2;14:e20707. doi: 10.7717/peerj.20707 (PMC12875250; doi:10.7717/peerj.20707)
Supplement: Supplemental Information 3 [file peerj-14-20707-s003.xlsx]

## Sheet: Renal index
Renal index
Control	Model
0.906264	1.17407
0.942499	1.18213
0.83993	1.13937
0.954301	1.21515
0.831731	1.21369
0.909886	1.36603

## Sheet: Scr
Scr(umol/l)
Control	Model
16.8	151.1
24.1	138.7
19.6	144.3
22.4	112.8
17.2	90.3
22.4	132.8

## Sheet: BUN
BUN
Control	Model
6.14	40.4
5.77	31.43
8.58	43.09
8.11	28.15
6.37	39.09
6.67	48.96

## Sheet: weight
weight(g)
	Control						Model
0	220.6	221	223.2	232	220	223	222.3	222.3	230	227	228	230
1	214.4	226	233.4	240	231	235	211	214.8	213.2	204	207	220
2	225	237	238	249	245	242	204.6	207.4	201.5	189	191	207
3	217	216.7	224.5	235	232	223	186	187	182.5	180	182	179.3
